# Supplementary material for: Wnt Pathway Gene Expression Is Associated With Arterial Stiffness
Source: PubMed Central journal article supplement — J Am Heart Assoc. 2020 Jan 30;9(3):e014170. doi: 10.1161/JAHA.119.014170 (PMC7033870; doi:10.1161/jaha.119.014170), 2020-01-30
Supplement: JAH3-9-e014170-s001.pdf [file JAH3-9-e014170-s001.pdf]

# **Supplemental Material**

**Table S1. List of All Genes Tested on the Nanostring nCounter Gene Expression Panel.**

| <b>Gene ID</b> | <b>Purpose</b> |
|----------------|----------------|
| APC            | Wnt Pathway    |
| AXIN1          | Wnt Pathway    |
| AXIN2          | Wnt Pathway    |
| CDH2           | Wnt Pathway    |
| CTNNB1         | Wnt Pathway    |
| DKK1           | Wnt Pathway    |
| DKK2           | Wnt Pathway    |
| DKK3           | Wnt Pathway    |
| DKK4           | Wnt Pathway    |
| FRZB           | Wnt Pathway    |
| FZD1           | Wnt Pathway    |
| FZD4           | Wnt Pathway    |
| FZD6           | Wnt Pathway    |
| FZD7           | Wnt Pathway    |
| FZD9           | Wnt Pathway    |
| GSK3B          | Wnt Pathway    |
| HNF1A          | Wnt Pathway    |
| KREMEN1        | Wnt Pathway    |
| LEF1           | Wnt Pathway    |
| LRP4           | Wnt Pathway    |
| LRP5           | Wnt Pathway    |
| LRP6           | Wnt Pathway    |
| SFRP1          | Wnt Pathway    |
| SFRP2          | Wnt Pathway    |
| SFRP4          | Wnt Pathway    |
| SFRP5          | Wnt Pathway    |
| SOST           | Wnt Pathway    |
| TCF4           | Wnt Pathway    |
| TCF7           | Wnt Pathway    |
| WIF1           | Wnt Pathway    |
| WISP1          | Wnt Pathway    |
| WISP2          | Wnt Pathway    |
| WISP3          | Wnt Pathway    |
| WNT1           | Wnt Pathway    |
| WNT3A          | Wnt Pathway    |
| WNT4           | Wnt Pathway    |
| WNT5A          | Wnt Pathway    |
| WNT5B          | Wnt Pathway    |
| WNT7A          | Wnt Pathway    |
| WNT7B          | Wnt Pathway    |
| WNT10B         | Wnt Pathway    |
| WNT11          | Wnt Pathway    |
| WNT16          | Wnt Pathway    |
| ABCF1          | Reference      |
| GUSB           | Reference      |
| HPRT1          | Reference      |

**Table S2. Spearman correlation coefficients between expressed wnt genes.**

|                 | AXIN1        | AXIN2        | CDH2         | CTNNB1       | FZD1          | FZD6         | GSK3B        | Kremen1      | LEF1          | SFRP2        | TCF4         | TCF7          | WNT16        | factor 1     | factor 2      | factor 3     |
|-----------------|--------------|--------------|--------------|--------------|---------------|--------------|--------------|--------------|---------------|--------------|--------------|---------------|--------------|--------------|---------------|--------------|
| <b>APC</b>      | <b>0.268</b> | <b>0.141</b> | <b>0.120</b> | <b>0.472</b> | <b>0.237</b>  | 0.084        | <b>0.672</b> | <b>0.441</b> | 0.062         | 0.041        | <b>0.155</b> | 0.050         | 0.096        | <b>0.718</b> | -0.015        | <b>0.215</b> |
| <b>AXIN1</b>    |              | <b>0.223</b> | 0.043        | <b>0.460</b> | -0.085        | -0.033       | <b>0.336</b> | 0.073        | 0.089         | 0.023        | <b>0.117</b> | <b>0.224</b>  | -0.026       | <b>0.391</b> | <b>0.180</b>  | -0.037       |
| <b>AXIN2</b>    |              |              | 0.062        | <b>0.216</b> | <b>-0.124</b> | <b>0.148</b> | 0.043        | -0.037       | <b>0.747</b>  | 0.049        | <b>0.261</b> | <b>0.788</b>  | 0.068        | 0.065        | <b>0.809</b>  | 0.083        |
| <b>CDH2</b>     |              |              |              | 0.028        | <b>0.172</b>  | <b>0.588</b> | 0.018        | 0.028        | 0.25          | <b>0.706</b> | 0.001        | 0.047         | <b>0.664</b> | 0.035        | 0.027         | <b>0.821</b> |
| <b>CTNNB1</b>   |              |              |              |              | 0.032         | -0.048       | <b>0.668</b> | <b>0.378</b> | <b>0.141</b>  | 0.018        | <b>0.202</b> | <b>0.184</b>  | 0.021        | <b>0.730</b> | <b>0.121</b>  | 0.010        |
| <b>FZD1</b>     |              |              |              |              |               | <b>0.203</b> | 0.083        | <b>0.140</b> | <b>-0.131</b> | <b>0.176</b> | 0.056        | <b>-0.182</b> | <b>0.140</b> | <b>0.107</b> | <b>-0.206</b> | <b>0.359</b> |
| <b>FZD6</b>     |              |              |              |              |               |              | -0.083       | -0.078       | <b>0.143</b>  | <b>0.508</b> | 0.014        | <b>0.122</b>  | <b>0.508</b> | -0.074       | <b>0.118</b>  | <b>0.816</b> |
| <b>GSK3B</b>    |              |              |              |              |               |              |              | <b>0.547</b> | -0.032        | -0.006       | 0.073        | 0.001         | -0.043       | <b>0.990</b> | -0.092        | -0.003       |
| <b>KREMEN1</b>  |              |              |              |              |               |              |              |              | -0.065        | 0.011        | -0.070       | -0.077        | -0.053       | <b>0.572</b> | <b>-0.130</b> | 0.042        |
| <b>LEF1</b>     |              |              |              |              |               |              |              |              |               | 0.021        | <b>0.184</b> | <b>0.884</b>  | 0.063        | -0.021       | <b>0.925</b>  | 0.030        |
| <b>SFRP2</b>    |              |              |              |              |               |              |              |              |               |              |              | -0.008        | 0.026        | <b>0.569</b> | 0.006         | <b>0.731</b> |
| <b>TCF4</b>     |              |              |              |              |               |              |              |              |               |              |              |               | <b>0.208</b> | 0.098        | <b>0.207</b>  | 0.097        |
| <b>TCF7</b>     |              |              |              |              |               |              |              |              |               |              |              |               |              | 0.013        | <b>0.986</b>  | 0.003        |
| <b>WNT16</b>    |              |              |              |              |               |              |              |              |               |              |              |               |              | 0.092        | 0.076         | <b>0.639</b> |
| <b>factor 1</b> |              |              |              |              |               |              |              |              |               |              |              |               |              |              | -0.028        | 0.022        |
| <b>factor 2</b> |              |              |              |              |               |              |              |              |               |              |              |               |              |              |               | -0.079       |
| <b>factor 3</b> |              |              |              |              |               |              |              |              |               |              |              |               |              |              |               |              |

**BOLD** signifies significant correlation (P<0.05)
